# Supplementary material for: Entrainment of the mouse circadian clock by sub-acute physical and psychological stress
Source: PubMed Central journal article supplement (PMC4466793; doi:10.1038/srep11417), 2015-06-15
Supplement: srep11417-s1.pdf [file srep11417-s1.pdf]

## **Supplementary Information**

### **Entrainment of the mouse circadian clock by sub-acute physical and psychological stress**

Yu Tahara<sup>1</sup>, Takuya Shiraishi<sup>1</sup>, Yosuke Kikuchi<sup>1</sup>, Atsushi Haraguchi<sup>1</sup>, Daisuke Kuriki<sup>1</sup>, Hiroyuki Sasaki<sup>1</sup>, Hiroyuki Motohashi<sup>1</sup>, Tomoko Sakai<sup>1</sup>, and Shigenobu Shibata<sup>1,\*</sup>

<sup>1</sup>Laboratory of Physiology and Pharmacology, School of Advanced Science and Engineering, Waseda University, Tokyo, Japan

\*Correspondence and proofs should be sent to:

Shigenobu Shibata

Laboratory of Physiology and Pharmacology, School of Advanced Science and Engineering

Waseda University

Wakamatsu-cho 2-2, Shinjuku-ku

Tokyo 162-8480, Japan

Telephone: +81-3-5369-7318; Fax: +81-3-3341-9815; E-mail: shibatas@waseda.jp

## **Supplemental methods**

### **ELISA**

Whole blood was allowed to clot by leaving it at room temperature for over 30 min, and then clots were removed by centrifuging at 3000 rpm and at room temperature for 20 min.

Sampling time is described in the Figure S6 legend. An ELISA (Assay Pro, MO, USA) was used to measure serum corticosterone levels according to the manufacturer's instructions.

### **HPLC**

Tissue monoamine content was measured by HPLC-ECD (HTEC 500) (Eicom, Kyoto, Japan). At ZT4.5, untreated mice (intact) and mice treated with restraint stress (ZT4–4.5) were deeply anaesthetized with isoflurane and their livers, kidneys, and submandibular glands were removed. To each tissue sample, we added 0.2 mol/l perchloric acid (including 100 µM EDTA · 2Na) and 20 ng of isoproterenol. Samples were homogenized using a micro homogenizer, and then centrifuged at 15,000 *g* and 4°C for 15 min. The supernatants were collected for each sample, and these were filtered using a 0.45-µm filter. The quantity of monoamine in each 20-µl sample was measured by using HPLC-ECD and the following conditions: the transfer phase consisted of a) 85 % of 0.1 mol/l acetate citric acid buffer (pH 3.5) including 5 mg/l EDTA · 2Na and 190 mg/l 1-octanesulfonic acid sodium salt and b) 15 % methanol (99 % purity); the velocity of the flow was 500 µL/min; the column temperature was set to 25°C; the applied voltage was set to +750 mV vs. Ag/AgCl. The data were analyzed with EPC-300 software (Eicom). Epinephrine could not be detected in the submandibular gland (sub gla).

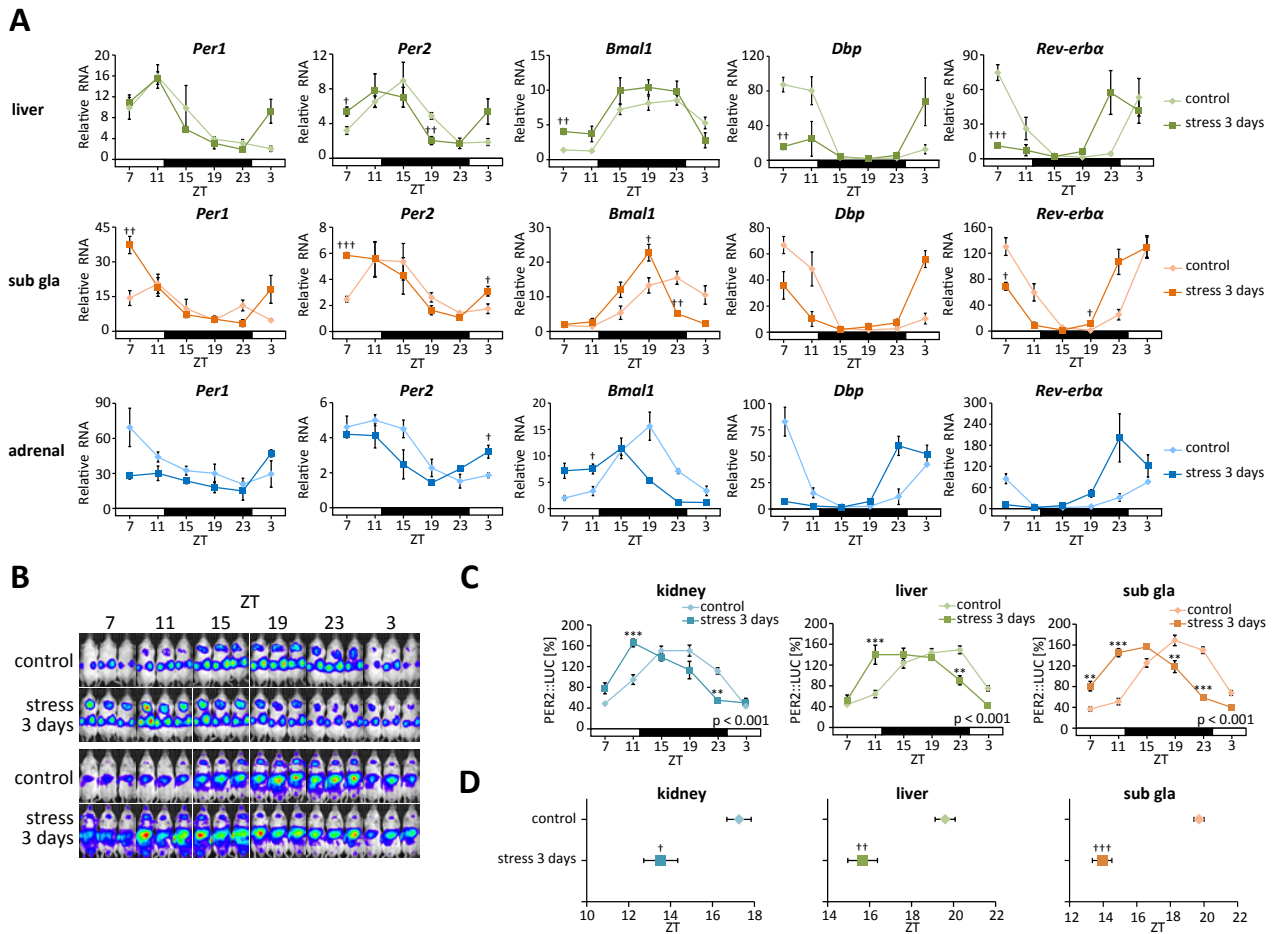

**Supplementary Figure S1. Restraint stress at ZT4–6 for 3 consecutive days causes phase-advance of clock gene expression rhythms in the brain and peripheral tissues.**

(A) mRNA expression profiles of clock genes in the liver, submandibular gland (sub gla), and adrenal gland in control mice and mice subjected to restraint stress for 3 days at ZT4–6 ( $n = 3$  for each time point). (B–D) Effects of 3 days of restraint stress at ZT4–6 on peripheral clocks in male PER2::LUC mice. Representative images of *in vivo* PER2::LUC bioluminescence in the kidney (B, upper panels) and in the liver and submandibular gland (D, lower panels) are shown. Waveforms (C) and peak phases (D) of PER2::LUC oscillations in each tissue are also shown. Values are expressed as mean  $\pm$  SEM. P values shown on the lower right side of each graph indicate results from a two-way ANOVA between the control and stress groups. \*\* $P < 0.01$ , \*\*\* $P < 0.001$  vs. control (two-way ANOVA with Tukey post-hoc test); † $P < 0.05$ , †† $P < 0.01$ , ††† $P < 0.001$  vs. control (Student's

t-test). The number of tissues that met the criteria for rhythmicity is shown in Table S1.

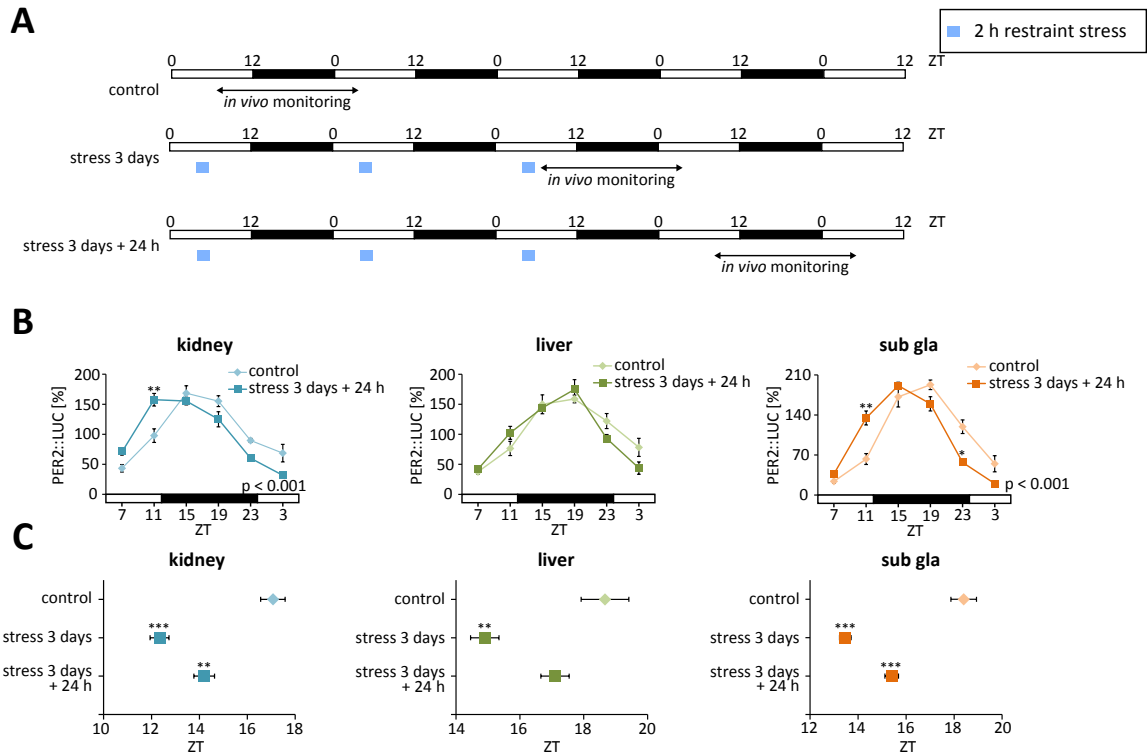

**Supplementary Figure S2. Phase-advance is maintained in peripheral clocks 24 h after restraint stress at ZT4–6 for 3 days.**

Mice were subjected to 3 days of restraint stress at ZT4–6, and PER2::LUC oscillations were measured starting from ZT7 on the day after the third session of stress exposure.

Experimental schedule (A), waveforms (B), and peak phases (C) of PER2::LUC oscillations in each tissue are shown. Values are expressed as mean  $\pm$  SEM. P values shown on the lower right side of each graph indicate results from a two-way ANOVA between the control and stress groups. \*\*P < 0.01, \*\*\*P < 0.001 vs. control (two-way ANOVA with Tukey post-hoc test). The number of tissues that met the criteria for rhythmicity is shown in Table S1.

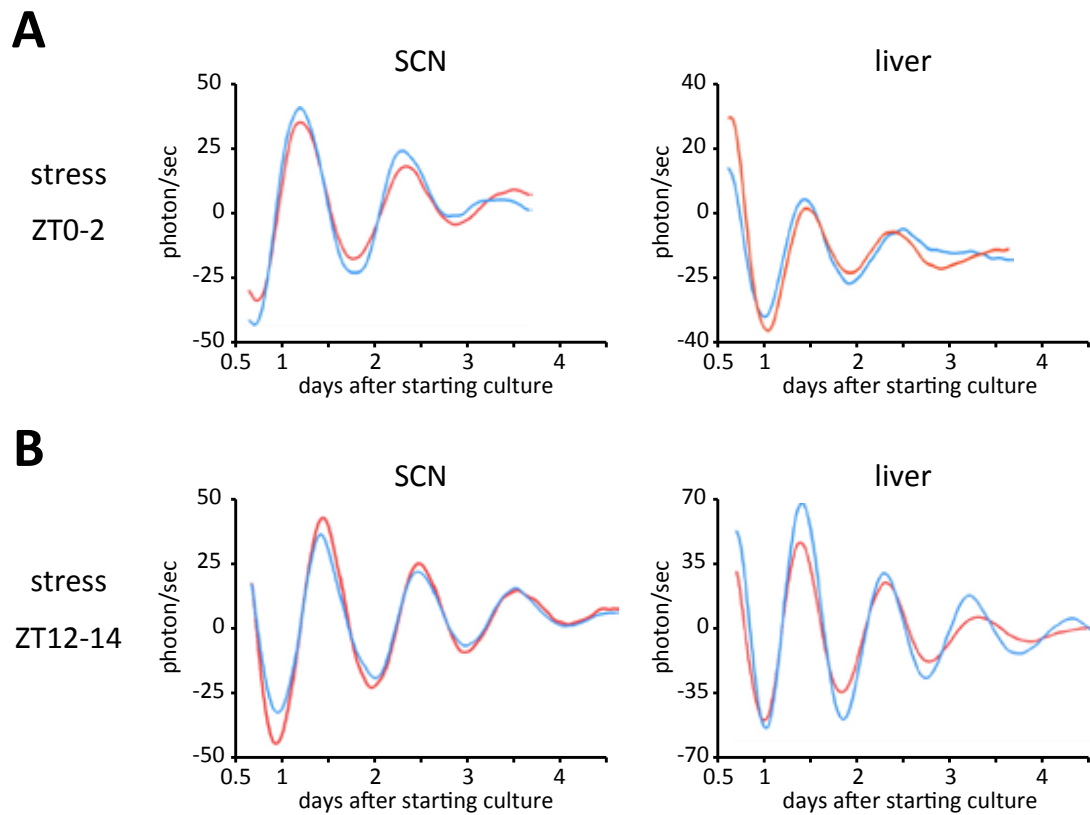

**Supplementary Figure S3. Effects of 3 days of restraint stress at ZT0–2 or ZT12–14 on the SCN and liver.**

PER2::LUC bioluminescence rhythms from SCN and liver explants of control (blue line) or stressed (red line) mice. Tissues were extracted at ZT5–6 and ZT1–2 after the final stress stimuli in each group, i.e. (A) stress ZT0–2 and (B) stress ZT12–14, respectively.

Waveforms were smoothed and detrended after measurement. The number of mice was  $n = 4$  for both the control group and the stress group in each experiment. The peak time of the first peak in (A) was  $25.9 \pm 0.5$  h for the control group and  $25.7 \pm 0.8$  h for the stress group in the SCN, and  $30.5 \pm 0.5$  h for the control group and  $31.2 \pm 0.4$  h for the stress group in the liver. The peak time of the first peak in (B) was  $32.9 \pm 0.4$  h for the control group and  $32.9 \pm 0.7$  h for the stress group in the SCN, and  $33.9 \pm 0.6$  h for the control group and  $34.2 \pm 0.3$  h for the stress group in the liver.

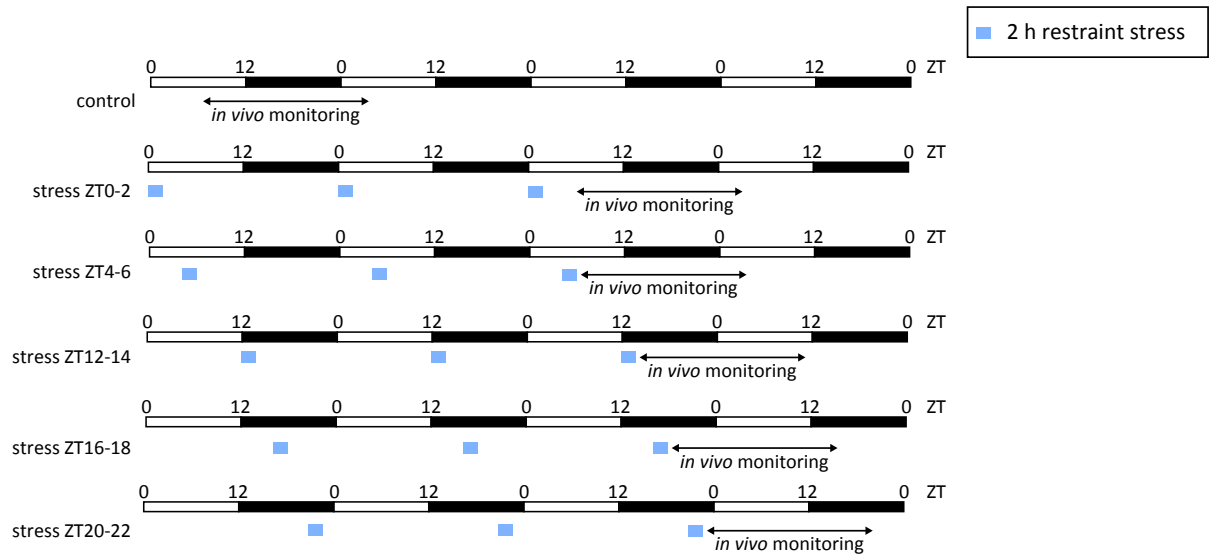

**Supplementary Figure S4. Experimental schedule of restraint stress at different time points.**

White and black bars indicate light and dark periods, respectively. Numbers on the white and black bars indicate ZT.

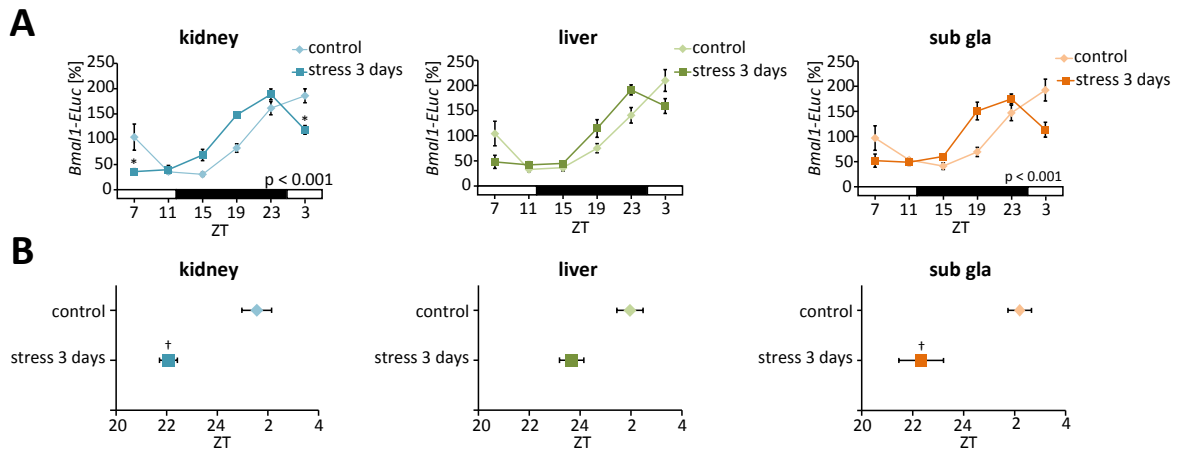

**Supplementary Figure S5. Effects of restraint stress at ZT4–6 on peripheral *Bmal1-ELuc* rhythms.**

Male *Bmal1-ELuc* mice were subjected to restraint stress at ZT4–6 for 3 consecutive days, after which *Bmal1-ELuc* rhythm was measured starting from ZT7 on the final day of stress exposure. Waveforms (A) and peak phases (B) of peripheral clocks are shown. Values are expressed as mean  $\pm$  SEM. P values shown on the lower right side of each graph indicate results from a two-way ANOVA between the control and stress groups. \*P < 0.05 vs. control (two-way ANOVA with Tukey post-hoc test); †P < 0.05 vs. control (Mann-Whitney test). The number of tissues that met the criteria for rhythmicity is shown in Table S1.



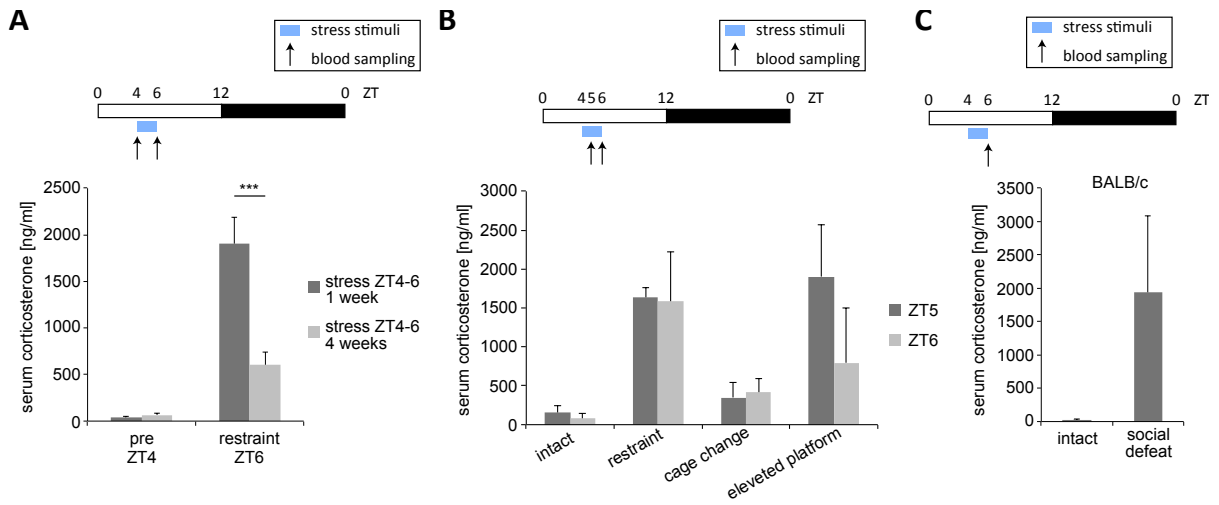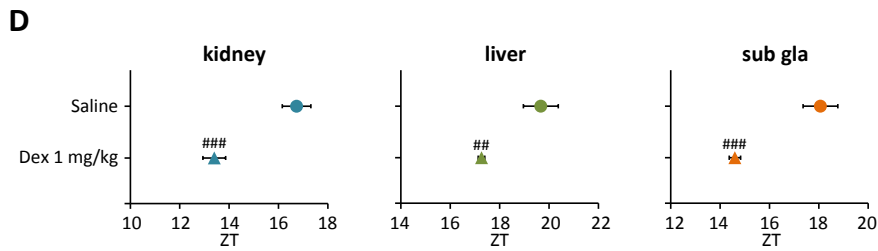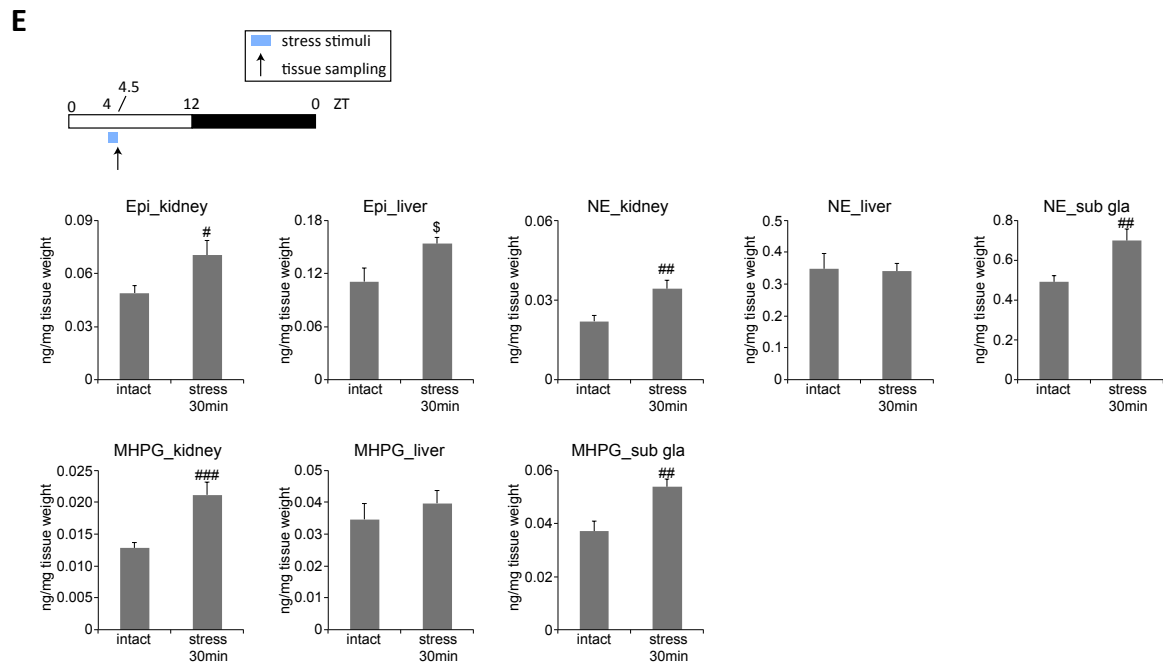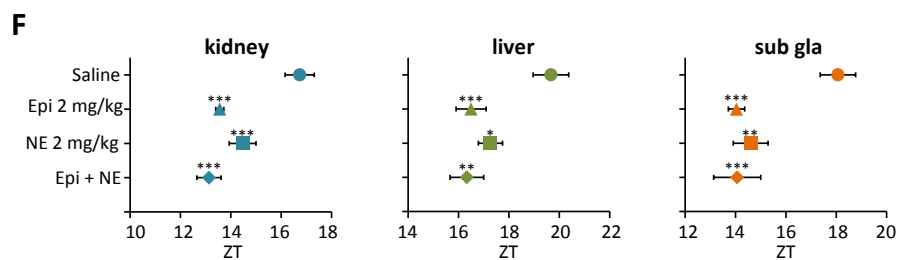

**Supplementary Figure S6. The roles of the HPA and SAM axes in stress-induced entrainment.**

(A) Serum corticosterone levels in mice subjected to a single period or repeated periods of 3 days restraint stress (related to Figure 5A). Blood samples were collected at ZT4 and ZT6 on day 3 of stress exposure.  $P < 0.01$ ,  $F(1, 12) = 22.30$ , for the interaction effect (two-way ANOVA).  $***P < 0.001$  (Sidak post hoc test). Values are expressed as mean  $\pm$  SEM.  $N = 4$  per group. (B, C) Levels of serum corticosterone in mice subjected to a single treatment of each stress exposure (related to Figure 6 and S7A). Serum was collected at ZT5 or ZT6 (B), and at ZT6 (C). Values are expressed as mean  $\pm$  SEM.  $N = 4$  per group, except in the elevated platform group where  $n = 3$ . (D) Peak phases of PER2::LUC oscillation in each tissue after injection of dexamethasone (Dex) (an analogue of corticosterone; 1 mg/kg, i.p.; Sigma-Aldrich, MO, USA) at ZT4 for 3 consecutive days.  $##P < 0.01$ ,  $###P < 0.001$  vs. saline (Student's t-test). (E) Catecholamine contents in peripheral tissues after 30 min of restraint stress by HPLC analysis. Epinephrine (Epi), norepinephrine (NE), and their metabolite (3-methoxy-4-hydroxyphenylglycol, MHPG) were measured. Values are expressed as mean + SEM.  $N = 9$  for intact and  $n = 6$  for restraint. (F) Peak phases of PER2::LUC oscillation in each tissue after injection of epinephrine (Epi), norepinephrine (NE), or both (2 mg/kg, i.p.; Sigma-Aldrich, MO, USA) at ZT4 for 3 consecutive days.  $*P < 0.05$ ,  $**P < 0.01$ ,  $***P < 0.001$  vs. saline (one-way ANOVA with Dunnett test). Values are expressed as mean  $\pm$  SEM.

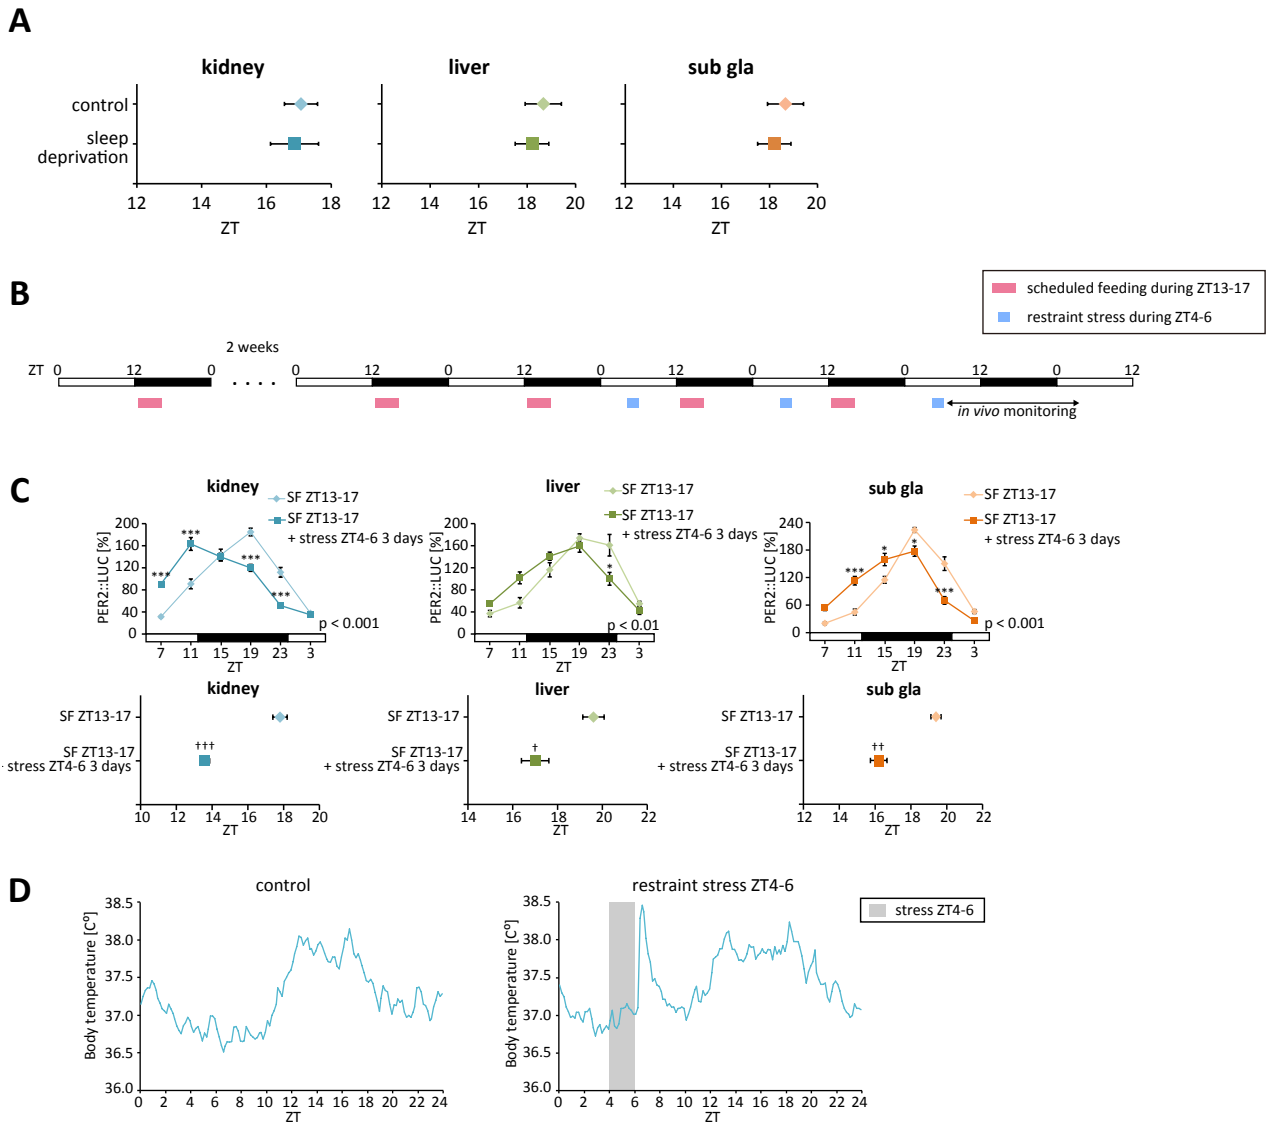

**Supplementary Figure S7. Effects of sleep deprivation or activity increase, feeding behaviour, and body temperature on restraint stress-induced phase entrainment in peripheral tissues.**

(A) Peak phases of PER2::LUC oscillation in each tissue after cage change stimulation (4 times at ZT4–6) for 3 days. Cage change stimulation increased activity and inhibited sleep, but the peripheral clocks were not responsive to these changes. (B) Experimental schedule for feeding and stress stimuli. After a 2-week period of adaptation to a scheduled feeding

paradigm (ZT13–17), mice were subjected to restraint stress at ZT4–6 for 3 days and PER2::LUC oscillations were monitored. Scheduled feeding was carried out using an automated feeding apparatus. (C) Waveforms and peak phases of PER2::LUC oscillations in each tissue. Increased activity was observed with lower intake of food after restraint stress (see Fig 5A), and the feeding behaviour in the light phase might cause phase-advance of the peripheral clocks. However, restraint-induced phase shift was observed even when feeding time was restricted to during the dark phase, suggesting that feeding behaviour is not involved in restraint stress-induced phase shift of the peripheral clocks. (D) Body temperature measured by intraperitoneal insertion of a temperature sensor (#3650, Hioki E.E. Co., Nagano, Japan). Values are expressed as mean  $\pm$  SEM (n = 8 per group). P values shown on the lower right side of each graph indicate results of a two-way ANOVA between the control and stress groups. \*P < 0.05, \*\*\*P < 0.001 vs. control (two-way ANOVA with Tukey post-hoc test); †P < 0.05, ††P < 0.01, †††P < 0.001 vs. control (Student's t-test).

**Supplementary Table S1. Number of mice examined and tissues that met (passed) rhythmicity criteria in each experimental group.**

| group name                            | sex    | strain            | number of mice | number of tissue samples (pass/total) |       |         | Figure No.                                   |
|---------------------------------------|--------|-------------------|----------------|---------------------------------------|-------|---------|----------------------------------------------|
|                                       |        |                   |                | kidney                                | liver | sub gla |                                              |
| control                               | female | PER2::LUC         | 6              | 6/6                                   | 6/6   | 6/6     | 1B, 1C, 2B, 4B, 4C, 5B,5D, S7A, 6A, S2B, S2C |
| restraint stress 1 day                | female | PER2::LUC         | 3              | 3/3                                   | 3/3   | 3/3     | 2B                                           |
| restraint stress 2 days               | female | PER2::LUC         | 6              | 6/6                                   | 4/6   | 6/6     | 2B                                           |
| restraint stress 3 days               | female | PER2::LUC         | 6              | 6/6                                   | 4/6   | 6/6     | 1B, 1C, 2B, 4A-C, 5B, S2C                    |
| restraint stress 4 days               | female | PER2::LUC         | 5              | 5/5                                   | 5/5   | 5/5     | 2B                                           |
| restraint stress 5 days               | female | PER2::LUC         | 3              | 3/3                                   | 3/3   | 3/3     | 2B                                           |
| restraint stress 6 days               | female | PER2::LUC         | 3              | 3/3                                   | 3/3   | 3/3     | 2B                                           |
| restraint stress 7 days               | female | PER2::LUC         | 6              | 6/6                                   | 6/6   | 6/6     | 2B                                           |
| restraint stress 14 days              | female | PER2::LUC         | 6              | 4/6                                   | 6/6   | 6/6     | 2B                                           |
| restraint stress 3 days + 24 hr       | female | PER2::LUC         | 4              | 4/4                                   | 4/4   | 4/4     | S2B, C                                       |
| restraint stress ZT0-2                | female | PER2::LUC         | 8              | 1/8                                   | 5/8   | 5/8     | 4A-D                                         |
| restraint stress ZT12-14              | female | PER2::LUC         | 4              | 4/4                                   | 4/4   | 4/4     | 4A-C                                         |
| restraint stress ZT16-18              | female | PER2::LUC         | 4              | 4/4                                   | 4/4   | 4/4     | 4A-C                                         |
| restraint stress ZT20-22              | female | PER2::LUC         | 5              | 5/5                                   | 4/5   | 5/5     | 4A-C                                         |
| control                               | male   | PER2::LUC         | 4              | 3/4                                   | 4/4   | 4/4     | S1B-D                                        |
| restraint stress 3 days               | male   | PER2::LUC         | 3              | 3/3                                   | 3/3   | 3/3     | S1B-D                                        |
| sleep deprivation                     | female | PER2::LUC         | 3              | 3/3                                   | 3/3   | 3/3     | S7A                                          |
| elevated platform                     | female | PER2::LUC         | 3              | 3/3                                   | 3/3   | 3/3     | 6A                                           |
| control                               | male   | <i>Bmal1-Eluc</i> | 6              | 5/6                                   | 5/6   | 6/6     | S5A, S5B, 6B                                 |
| restraint stress 3 days               | male   | <i>Bmal1-Eluc</i> | 3              | 3/3                                   | 3/3   | 3/3     | S5A, S5B                                     |
| social defeat                         | male   | <i>Bmal1-Eluc</i> | 6              | 5/6                                   | 6/6   | 4/6     | 6B                                           |
| restraint stress ZT4-6 3 days, 4weeks | female | PER2::LUC         | 9              | 8/9                                   | 9/9   | 9/9     | 5B                                           |
| control                               | female | PER2::LUC         | 3              | 3/3                                   | 3/3   | 3/3     | 5D                                           |
| restraint stress ZT0-2 3 days, 5weeks | female | PER2::LUC         | 3              | 3/3                                   | 3/3   | 3/3     | 5D                                           |
| SF ZT13-17                            | female | PER2::LUC         | 4              | 4/4                                   | 4/4   | 4/4     | S7C                                          |
| SF ZT13-17 + restraint stress         | female | PER2::LUC         | 4              | 4/4                                   | 3/4   | 4/4     | S7C                                          |
| saline                                | female | PER2::LUC         | 6              | 6/6                                   | 6/6   | 6/6     | S6D, S6F                                     |
| Dex 1 mg/kg                           | female | PER2::LUC         | 3              | 3/3                                   | 3/3   | 3/3     | S6D                                          |
| Epi 2 mg/kg                           | female | PER2::LUC         | 5              | 5/5                                   | 4/5   | 5/5     | S6F                                          |
| NE 2 mg/kg                            | female | PER2::LUC         | 3              | 3/3                                   | 3/3   | 3/3     | S6F                                          |
| Epi + NE                              | female | PER2::LUC         | 3              | 3/3                                   | 3/3   | 3/3     | S6F                                          |

SF, scheduled feeding; sub gla, submandibular gland; ZT, Zeitgeber time.

**Supplementary Table S2. Statistical analyses of data analysed with one- or two-way ANOVA.**

| Figure No. | detail          | ANOVA                     | main effect A |                   |           | main effect B |                  |           | Interaction effect  |           |
|------------|-----------------|---------------------------|---------------|-------------------|-----------|---------------|------------------|-----------|---------------------|-----------|
|            |                 |                           | factor        | F                 | P-value   | factor        | F                | P-value   | F                   | P-value   |
| 1C         | kidney          | two-way repeated measures | time          | F (5, 50) = 44.20 | p < 0.001 | group         | F (1, 10) = 1.00 | p = 0.340 | F = (5, 50) = 22.97 | p < 0.001 |
| 1C         | liver           | two-way repeated measures | time          | F (5, 40) = 25.74 | p < 0.001 | group         | F (1, 8) = 0.64  | p = 0.446 | F = (5, 40) = 7.52  | p < 0.001 |
| 1C         | sub gla         | two-way repeated measures | time          | F (5, 50) = 59.42 | p < 0.001 | group         | F (1, 10) = 1.00 | p = 0.340 | F (5, 50) = 31.73   | p < 0.001 |
| 1D         | Per2            | two-way                   | time          | F (5, 24) = 22.23 | p < 0.001 | group         | F (1, 24) = 1.56 | p = 0.223 | F (5, 24) = 14.59   | p < 0.001 |
| 1E         | Per1            | two-way                   | time          | F (5, 24) = 4.95  | p < 0.01  | group         | F (1, 24) = 0.38 | p = 0.538 | F (5, 24) = 5.18    | p < 0.01  |
| 1E         | Per2            | two-way                   | time          | F (5, 24) = 5.91  | p < 0.01  | group         | F (1, 24) = 0.22 | p = 0.639 | F (5, 24) = 5.00    | p < 0.01  |
| 1F         | Per1            | two-way                   | time          | F (5, 24) = 4.49  | p < 0.01  | group         | F (1, 24) = 5.00 | p < 0.05  | F (5, 24) = 4.47    | p < 0.01  |
| 1F         | Per2            | two-way                   | time          | F (5, 24) = 7.03  | p < 0.001 | group         | F (1, 24) = 0.09 | p = 0.762 | F (5, 24) = 11.08   | p < 0.001 |
| 2B         | kidney          | one-way                   | group         | F (8, 33) = 19.94 | p < 0.001 |               |                  |           |                     |           |
| 2B         | liver           | one-way                   | group         | F (8, 31) = 10.02 | p < 0.001 |               |                  |           |                     |           |
| 2B         | sub gla         | one-way                   | group         | F (8, 35) = 20.61 | p < 0.001 |               |                  |           |                     |           |
| 5B         | kidney (upper)  | two-way repeated measures | time          | F (5, 60) = 87.63 | p < 0.001 | group         | F (1, 12) = 0.05 | p = 0.818 | F (5, 60) = 18.10   | p < 0.001 |
| 5B         | liver (upper)   | two-way repeated measures | time          | F (5, 55) = 52.01 | p < 0.001 | group         | F (1, 11) = 1.31 | p = 0.275 | F (5, 55) = 9.27    | p < 0.001 |
| 5B         | sub gla (upper) | two-way repeated measures | time          | F (5, 65) = 105.9 | p < 0.001 | group         | F (1, 13) = 0.78 | p = 0.392 | F (5, 65) = 12.27   | p < 0.001 |
| 5B         | kidney (lower)  | one-way                   | group         | F (2, 17) = 21.50 | p < 0.001 |               |                  |           |                     |           |
| 5B         | liver (lower)   | one-way                   | group         | F (2, 16) = 8.12  | p < 0.01  |               |                  |           |                     |           |
| 5B         | sub gla (lower) | one-way                   | group         | F (2, 18) = 25.30 | p < 0.001 |               |                  |           |                     |           |
| 6B         | kidney          | two-way repeated measures | time          | F (5, 40) = 38.68 | p < 0.001 | group         | F (1, 8) = 0.65  | p = 0.443 | F (5, 40) = 9.21    | p < 0.001 |
| 6B         | liver           | two-way repeated measures | time          | F (5, 45) = 45.10 | p < 0.001 | group         | F (1, 9) = 0.67  | p = 0.431 | F (5, 45) = 3.74    | p < 0.01  |
| 6B         | sub gla         | two-way repeated measures | time          | F (5, 40) = 26.81 | p < 0.001 | group         | F (1, 8) = 0.11  | p = 0.741 | F (5, 40) = 8.44    | p < 0.001 |
| S1C        | kidney          | two-way repeated measures | time          | F (5, 20) = 36.84 | p < 0.001 | group         | F (1, 4) = 0.04  | p = 0.844 | F (5, 20) = 11.74   | p < 0.001 |
| S1C        | liver           | two-way repeated measures | time          | F (5, 25) = 32.74 | p < 0.001 | group         | F (1, 5) = 0.43  | p = 0.538 | F (5, 25) = 11.94   | p < 0.001 |
| S1C        | sub gla         | two-way repeated measures | time          | F (5, 25) = 7.88  | p < 0.001 | group         | F (1, 5) = 7.88  | p < 0.05  | F (5, 25) = 37.83   | p < 0.001 |
| S2B        | kidney          | two-way repeated measures | time          | F (5, 40) = 41.74 | p < 0.001 | group         | F (1, 8) = 0.64  | p = 0.743 | F (5, 40) = 7.05    | p < 0.001 |
| S2B        | sub gla         | two-way repeated measures | time          | F (5, 40) = 62.31 | p < 0.001 | group         | F (1, 8) = 0.64  | p = 0.446 | F (5, 40) = 8.62    | p < 0.001 |
| S2C        | kidney          | one-way                   | group         | F (2, 13) = 29.96 | p < 0.001 |               |                  |           |                     |           |
| S2C        | liver           | one-way                   | group         | F (2, 11) = 8.71  | p < 0.01  |               |                  |           |                     |           |
| S2C        | sub gla         | one-way                   | group         | F (2, 13) = 42.67 | p < 0.001 |               |                  |           |                     |           |
| S4A        | kidney          | two-way repeated measures | time          | F (5, 30) = 28.49 | p < 0.001 | group         | F (1, 6) = 1.31  | p < 0.001 | F (5, 30) = 7.03    | p < 0.001 |
| S4A        | sub gla         | two-way repeated measures | time          | F (5, 35) = 19.85 | p < 0.001 | group         | F (1, 7) = 1.81  | p = 0.22  | F (5, 35) = 6.58    | p < 0.001 |
| S6C        | kidney          | two-way repeated measures | time          | F (5, 30) = 75.61 | p < 0.001 | group         | F (1, 6) = 0.13  | p = 0.726 | F (5, 30) = 28.26   | p < 0.001 |
| S5C        | liver           | two-way repeated measures | time          | F (5, 25) = 35.11 | p < 0.001 | group         | F (1, 5) = 0.01  | p = 0.905 | F (5, 25) = 5.07    | p < 0.01  |
| S5C        | sub gla         | two-way repeated measures | time          | F (5, 30) = 90.30 | p < 0.001 | group         | F (1, 6) = 0.33  | p = 0.582 | F (5, 30) = 18.76   | p < 0.001 |
| S6F        | kidney          | one-way                   | group         | F (3, 13) = 28.87 | p < 0.001 |               |                  |           |                     |           |
| S6F        | liver           | one-way                   | group         | F (3, 12) = 12.50 | p < 0.001 |               |                  |           |                     |           |
| S6F        | sub gla         | one-way                   | group         | F (3, 13) = 15.26 | p < 0.001 |               |                  |           |                     |           |

**Supplementary Table S3. Cosinor analysis of RT-PCR data.**

| Figure No. | Tissue      | Gene name                          | Group   | Goodness of fit | Achrophase (hr) | Phase shift vs. control (hr) |
|------------|-------------|------------------------------------|---------|-----------------|-----------------|------------------------------|
| 1D         | kidney      | <i>Per1</i>                        | control | 0.05            | 10.6            |                              |
| 1D         | kidney      | <i>Per1</i>                        | stress  | 0.021           | 7               | -3.6                         |
| 1D         | kidney      | <i>Per2</i>                        | control | 0.018           | 13              |                              |
| 1D         | kidney      | <i>Per2</i>                        | stress  | 0.006           | 7.8             | -5.2                         |
| 1D         | kidney      | <i>Bmal1</i>                       | control | 0.024           | 19              |                              |
| 1D         | kidney      | <i>Bmal1</i>                       | stress  | 0.042           | 15.8            | -3.2                         |
| 1D         | kidney      | <i>Dbp</i>                         | control | 0.04            | 7.8             |                              |
| 1D         | kidney      | <i>Dbp</i>                         | stress  | 0.064           | 3               | -4.8                         |
| 1D         | kidney      | <i>Rev-erb <math>\alpha</math></i> | control | 0.07            | 3               |                              |
| 1D         | kidney      | <i>Rev-erb <math>\alpha</math></i> | stress  | 0.015           | 0.6             | -2.4                         |
| 1E         | hippocampus | <i>Per1</i>                        | control | 0.059           | 13              |                              |
| 1E         | hippocampus | <i>Per1</i>                        | stress  | 0.054           | 7               | -6                           |
| 1E         | hippocampus | <i>Per2</i>                        | control | 0.053           | 13              |                              |
| 1E         | hippocampus | <i>Per2</i>                        | stress  | 0.041           | 7.8             | -5.2                         |
| 1F         | cortex      | <i>Per1</i>                        | control | 0.354           | (12.2)          |                              |
| 1F         | cortex      | <i>Per1</i>                        | stress  | 0.051           | 7               | (-5.2)                       |
| 1F         | cortex      | <i>Per2</i>                        | control | 0.084           | 14.6            |                              |
| 1F         | cortex      | <i>Per2</i>                        | stress  | 0.045           | 7.4             | -7.2                         |
| 4E         | kidney      | <i>Per1</i>                        | stress  | 5.45            | (3)             |                              |
| 4E         | kidney      | <i>Per2</i>                        | stress  | 0.271           | (3)             |                              |
| 4E         | kidney      | <i>Bmal1</i>                       | stress  | 0.029           | 13              | -6                           |
| 4E         | kidney      | <i>Rev-erb <math>\alpha</math></i> | stress  | 0.063           | 20.2            | -6.8                         |
| 4E         | kidney      | <i>Dbp</i>                         | stress  | 0.011           | 23              | -8.8                         |
| S1A        | liver       | <i>Per1</i>                        | control | 0.026           | 11.4            |                              |
| S1A        | liver       | <i>Per1</i>                        | stress  | 0.035           | 9               | -2.4                         |
| S1A        | liver       | <i>Per2</i>                        | control | 0.016           | 14.2            |                              |
| S1A        | liver       | <i>Per2</i>                        | stress  | 0.059           | 10.2            | -4                           |
| S1A        | liver       | <i>Bmal1</i>                       | control | 0.024           | 20.6            |                              |
| S1A        | liver       | <i>Bmal1</i>                       | stress  | 0.046           | 18.6            | -2                           |
| S1A        | liver       | <i>Dbp</i>                         | control | 0.066           | 8.6             |                              |
| S1A        | liver       | <i>Dbp</i>                         | stress  | 0.216           | (3)             | (-5.6)                       |
| S1A        | liver       | <i>Rev-erb <math>\alpha</math></i> | control | 0.042           | 7               |                              |
| S1A        | liver       | <i>Rev-erb <math>\alpha</math></i> | stress  | 0.066           | 1               | -6                           |
| S1A        | sub gla     | <i>Per1</i>                        | control | 0.152           | (10.2)          |                              |
| S1A        | sub gla     | <i>Per1</i>                        | stress  | 0.041           | 7.4             | (-2.8)                       |
| S1A        | sub gla     | <i>Per2</i>                        | control | 0.025           | 13              |                              |
| S1A        | sub gla     | <i>Per2</i>                        | stress  | 0.006           | 9.8             | -3.2                         |
| S1A        | sub gla     | <i>Bmal1</i>                       | control | 0.006           | 22.2            |                              |
| S1A        | sub gla     | <i>Bmal1</i>                       | stress  | 0.072           | 18.2            | -4                           |
| S1A        | sub gla     | <i>Dbp</i>                         | control | 0.061           | 8.2             |                              |
| S1A        | sub gla     | <i>Dbp</i>                         | stress  | 0.102           | (3)             | (-5.2)                       |
| S1A        | sub gla     | <i>Rev-erb <math>\alpha</math></i> | control | 0.051           | 7               |                              |
| S1A        | sub gla     | <i>Rev-erb <math>\alpha</math></i> | stress  | 0.017           | 2.2             | -4.8                         |
| S1A        | adrenal     | <i>Per1</i>                        | control | 0.102           | (8.6)           |                              |
| S1A        | adrenal     | <i>Per1</i>                        | stress  | 0.205           | (7)             | (-1.6)                       |
| S1A        | adrenal     | <i>Per2</i>                        | control | 0.016           | 11              |                              |
| S1A        | adrenal     | <i>Per2</i>                        | stress  | 0.007           | 7.8             | -3.2                         |
| S1A        | adrenal     | <i>Bmal1</i>                       | control | 0.026           | 18.2            |                              |
| S1A        | adrenal     | <i>Bmal1</i>                       | stress  | 0.035           | 13              | -5.2                         |
| S1A        | adrenal     | <i>Dbp</i>                         | control | 0.085           | 7               |                              |
| S1A        | adrenal     | <i>Dbp</i>                         | stress  | 0.059           | 1               | -6                           |
| S1A        | adrenal     | <i>Rev-erb <math>\alpha</math></i> | control | 0.073           | 3               |                              |
| S1A        | adrenal     | <i>Rev-erb <math>\alpha</math></i> | stress  | 0.053           | 23.8            | -3.2                         |

Goodness of fit values ( $<0.1$ ) represent rhythmic oscillation. The acrophase and phase difference values in parenthesis are arrhythmic oscillations.



**Supplementary Table S4. Primer sequences for RT-PCR analysis.**

|                 |                                |
|-----------------|--------------------------------|
| <i>Gapdh</i>    | 5'-tgggaaggtcgggtggaac-3'      |
|                 | 5'-aatgaaggggtcgttgatgg-3'     |
| <i>Per1</i>     | 5'-caagtggaatgagtccaacg-3'     |
|                 | 5'-cgaagttgagctcccgaagtg-3'    |
| <i>Per2</i>     | 5'-tgtgtgcttacacgggtgccta-3'   |
|                 | 5'-acgtttggttgcgcatgaa-3'      |
| <i>Bmal1</i>    | 5'-ccacctcagagccattgataca-3'   |
|                 | 5'-gagcaggttagttccactttgtct-3' |
| <i>Cry1</i>     | 5'-atccgctgctctatacctc-3'      |
|                 | 5'-cccgaatcacaacagacg-3'       |
| <i>Dbp</i>      | 5'-ccgtggaggtgctaatacct-3'     |
|                 | 5'-cctctgagaagcgggcct-3'       |
| <i>Rev-erba</i> | 5'-cttccgtgacctttctcagc-3'     |
|                 | 5'-cagctcctcctcgtaagtg-3'      |
